# Supplementary material for: Components of RNA granules affect their localization and dynamics in neuronal dendrites
Source: PubMed Central journal article supplement — Mol Biol Cell. 2017 Jun 1;28(11):1412–7. doi: 10.1091/mbc.E16-07-0497 (PMC5449141; doi:10.1091/mbc.e16-07-0497), 2017-06-01
Supplement: supp_E16-07-0497v1_CombinedSupMats.pdf [file supp_E16-07-0497v1_CombinedSupMats.pdf]

# Supplemental Materials

*Molecular Biology of the Cell*

Mitsumori et al.

**Figure S1. Assessment of MyosinVa silencing**

(A) Forty-eight hours after transfection with pcDNA6.2-GW/EmGFP-MyosinVamiR vectors, the neurons (15 DIV) were fixed and stained with anti-MyosinVa antibodies. White arrowheads indicate transfected neurons.

(B) N1E-115 neuroblastoma cells were transfected with pcDNA6.2-GW/EmGFP-MyosinVamiR vectors or control vectors. Protein samples were recovered at 72 h post-transfection and subjected to immunoblotting. Knockdown levels normalized to the levels of control cells;  $29.2 \pm 6.4$  % (means  $\pm$ SEM, value from five independent experiments).

**A**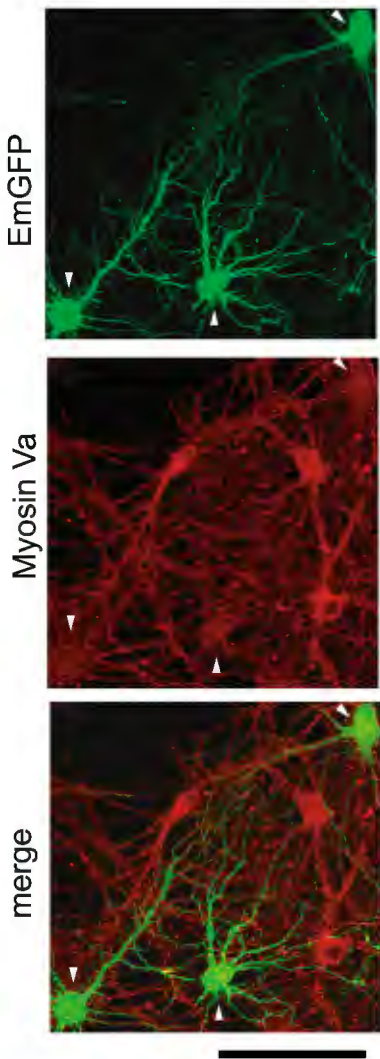**B**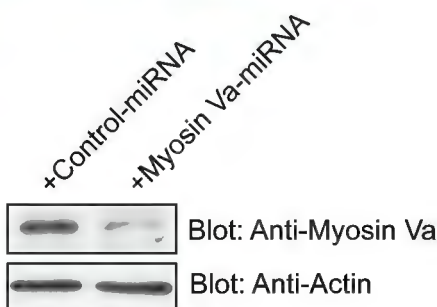

Figure S1
